# Supplementary material
Source: publisher figshare collection journal article supplement (https://frontiersin.figshare.com/ndownloader/files/14634608)
Supplement: Supplementary file 1 [file 14634608]

## Sheet: Sheet1
Table S3. Fungal representation within ocean metagenome. Metagenomes were
subsampled to equal depth (1,472,710 reads) before annotation using fuNOG and RefSeq
fungal genomes). Reads detected based on matches to both databases.
ANOVA by function
Source	DF	Sum of Squares	Mean Square	F Ratio	Prob > F
Region	5	3024	605	236981	<2e-16
Depth2	1	6949	6949	2722831	<2e-16
Region:Depth2	5	639	128	50054	<2e-16
Residuals	2346234	5988	0
ANOVA by taxa
Source	DF	Sum of Squares	Mean Square	F Ratio	Prob > F
Region	5	2848	570	223194	<2e-16
Depth2	1	6545	6545	2564421	<2e-16
Region:Depth2	5	602	120	47142	<2e-16
Residuals	2209734	5640	0
Kruskal-Wallis rank sum test by function
Source	ChiSquare	DF	p-value
Region	1022400	5	< 2.2e-16
Depth2	34265	1	< 2.2e-16
Region:Depth2	1596200	11	< 2.2e-16
Kruskal-Wallis rank sum test by taxa
Source	ChiSquare	DF	p-value
Region	298350	5	< 2.2e-16
Depth2	1135100	1	< 2.2e-16
Region:Depth2	1503400	11	< 2.2e-16

## Sheet: Wilcoxon_functions
Pairwise comparisons using Wilcoxon rank sum test [corrected p values with BH] for Shannon diversity based on functions
	IO.EPI	NAO.EPI	NPO.EPI	SAO.EPI	SO.EPI	SPO.EPI	IO.MES	NAO.MES	NPO.MES	SAO.MES	SO.MES
NAO.EPI	<2e-16	-	-	-	-	-	-	-	-	-	-
NPO.EPI	1	<2e-16	-	-	-	-	-	-	-	-	-
SAO.EPI	<2e-16	<2e-16	<2e-16	-	-	-	-	-	-	-	-
SO.EPI	<2e-16	<2e-16	<2e-16	<2e-16	-	-	-	-	-	-	-
SPO.EPI	<2e-16	<2e-16	<2e-16	<2e-16	<2e-16	-	-	-	-	-	-
IO.MES	<2e-16	<2e-16	<2e-16	<2e-16	<2e-16	<2e-16	-	-	-	-	-
NAO.MES	<2e-16	<2e-16	<2e-16	<2e-16	<2e-16	<2e-16	<2e-16	-	-	-	-
NPO.MES	<2e-16	<2e-16	<2e-16	<2e-16	<2e-16	<2e-16	<2e-16	1	-	-	-
SAO.MES	<2e-16	<2e-16	<2e-16	<2e-16	<2e-16	<2e-16	1	<2e-16	<2e-16	-	-
SO.MES	<2e-16	<2e-16	<2e-16	<2e-16	<2e-16	<2e-16	1	<2e-16	<2e-16	1	-
SPO.MES	<2e-16	<2e-16	<2e-16	<2e-16	<2e-16	<2e-16	<2e-16	<2e-16	<2e-16	<2e-16	<2e-16

## Sheet: Wilcoxon_taxa_genera
Pairwise comparisons using Wilcoxon rank sum test [corrected p values with BH] for Shannon diversity based on Genera
	IO.EPI	NAO.EPI	NPO.EPI	SAO.EPI	SO.EPI	SPO.EPI	IO.MES	NAO.MES	NPO.MES	SAO.MES	SO.MES
NAO.EPI	<2e-16	-	-	-	-	-	-	-	-	-	-
NPO.EPI	1	<2e-16	-	-	-	-	-	-	-	-	-
SAO.EPI	<2e-16	<2e-16	<2e-16	-	-	-	-	-	-	-	-
SO.EPI	<2e-16	<2e-16	<2e-16	<2e-16	-	-	-	-	-	-	-
SPO.EPI	<2e-16	<2e-16	<2e-16	<2e-16	<2e-16	-	-	-	-	-	-
IO.MES	<2e-16	<2e-16	<2e-16	<2e-16	<2e-16	<2e-16	-	-	-	-	-
NAO.MES	<2e-16	<2e-16	<2e-16	<2e-16	<2e-16	<2e-16	<2e-16	-	-	-	-
NPO.MES	<2e-16	<2e-16	<2e-16	<2e-16	<2e-16	<2e-16	<2e-16	1	-	-	-
SAO.MES	<2e-16	<2e-16	<2e-16	<2e-16	<2e-16	<2e-16	1	<2e-16	<2e-16	-	-
SO.MES	<2e-16	<2e-16	<2e-16	<2e-16	<2e-16	<2e-16	1	<2e-16	<2e-16	1	-
SPO.MES	<2e-16	<2e-16	<2e-16	<2e-16	<2e-16	<2e-16	<2e-16	<2e-16	<2e-16	<2e-16	<2e-16
